# Supplementary material for: Evaluation of Sweat-Sampling Procedures for Human Stress-Biomarker Detection
Source: MDPI journal article supplement (doi:10.3390/analytica3020013), 2022-04-16
Supplement: s1 [file s1]

Figures Supplementary Material:

**Figure S1.** Sweat box plot results by LC – MSMS analysis for (a) Ach, (b) DOPAC, (c) NE, (d) Glu, (e) Ade, (f) Crea, (g) Gln, (h) His, (i) Ile, (j) Leu, (k) Lys (l) Asc, (m) Lacta, (n) Gluc and (o) Create and (p) Cort potential biomarkers.

**Figure S2.** Blood analysis results by clinical analysis laboratory of (a) Phe, (b) Tyr, (c) Tryp, (d) DA, (e) 5-HT, (f) Cor, (g) E, (h) NE, (i) Total Catecholamines and (j) Creat biomarkers by HPLC high resolution.
